# Supplementary material for: Highly efficient metal-free electrocatalysts toward oxygen reduction derived from carbon nanotubes@polypyrrole core–shell hybrids
Source: Royal Society of Chemistry journal article supplement (doi:10.1039/c6ta08892a), 2016-01-01
Supplement: c6ta08892a1.pdf [file c6ta08892a1.pdf]

## Supplementary Information for

# Highly Efficient Metal-Free Electrocatalysts toward Oxygen Reduction Derived from Carbon Nanotubes@Polypyrrole Core-Shell Hybrids

Hongli An, Ruikang Zhang, Zhenhua Li, Lei Zhou, Mingfei Shao\* and Min Wei\*

State Key Laboratory of Chemical Resource Engineering, Beijing University of  
Chemical Technology, Beijing 100029, China

E-mail: shaomf@mail.buct.edu.cn (M. Shao); weimin@mail.buct.edu.cn (M. Wei)

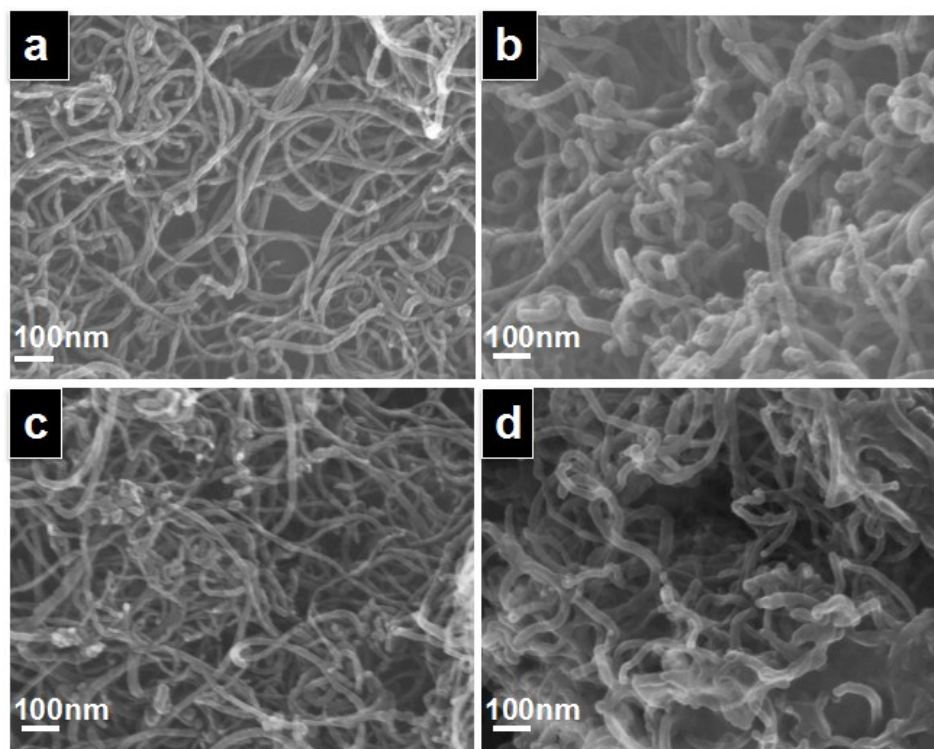

**Fig. S1** SEM images of (a) CNTs, (b) CNTs@PPy, (c) CNTs-P800, and (d) CNTs@PPy-P800, respectively.

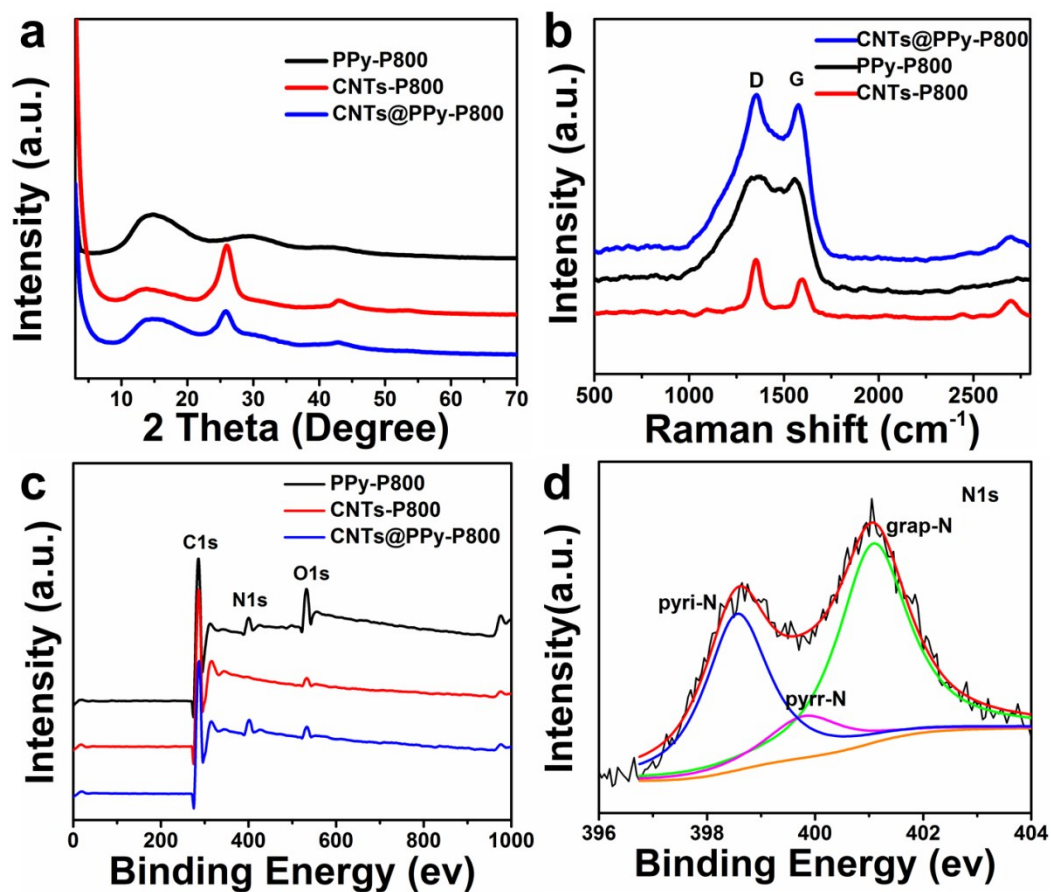

**Fig. S2** (a) XRD patterns of PPy-P800, CNTs-P800, and CNTs@PPy-P800. (b) Raman spectra of CNTs-P800, PPy-P800, and CNTs@PPy-P800. (c) XPS survey spectra of PPy-P800, CNTs-P800, and CNTs@PPy-P800. (d) High resolution scans of N1s for CNTs@PPy-P800.

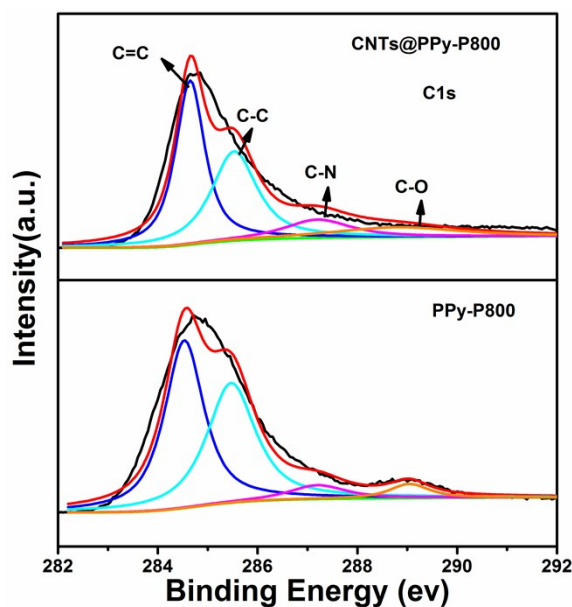

**Fig. S3** High resolution scans of C1s for the PPy-P800 and CNTs@PPy-P800.

**Table S1.** Percentage of various carbon species as a function of PPy-P800 and CNTs@PPy-P800.

| Sample        | C=C(%) | C-C(%) | C-N(%) | C-O(%) |
|---------------|--------|--------|--------|--------|
| PPy-P800      | 48.02  | 42.33  | 5.64   | 4.01   |
| CNTs@PPy-P800 | 42.61  | 35.84  | 10.73  | 10.82  |

**Table S2.** Comparison of the onset potential, half-wave potential and current density for CNTs-P800, PPy-P800, CNTs@PPy-P800, and Pt/C

| Sample        | $E_{\text{onset}}$ vs. RHE (V) | $E_{1/2}$ vs. RHE (V) | Current density ( $\text{mA cm}^{-2}$ at 0.2V) |
|---------------|--------------------------------|-----------------------|------------------------------------------------|
| CNTs-P800     | 0.82                           | 0.65                  | 3.36                                           |
| PPy-P800      | 0.78                           | 0.58                  | 4.00                                           |
| CNTs@PPy-P800 | 0.95                           | 0.81                  | 6.82                                           |
| Pt/C          | 0.94                           | 0.80                  | 4.94                                           |

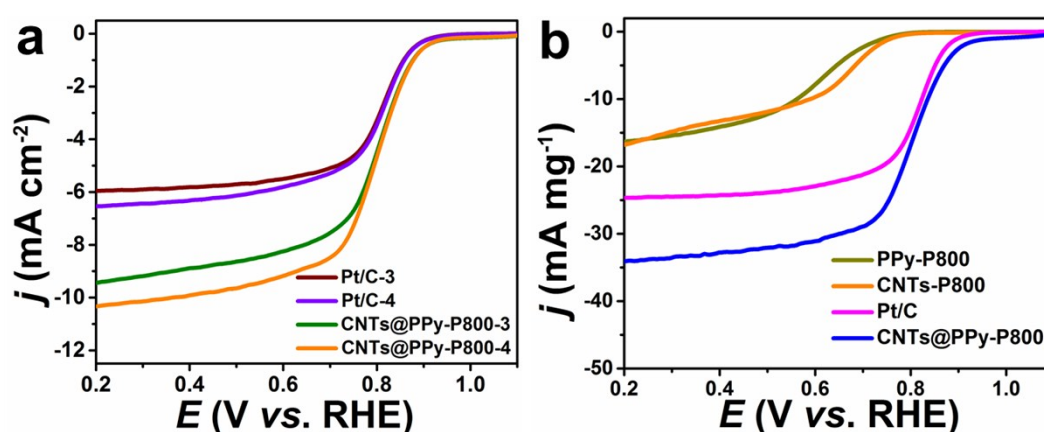

**Fig. S4** (a) LSV curves of CNTs@PPy-P800, and Pt/C with different catalyst loading ( $3\text{ mg cm}^{-2}$ ,  $4\text{ mg cm}^{-2}$ ). (b) LSV curves of PPy-P800, CNTs-P800, CNTs@PPy-P800,

and Pt/C catalyst in O<sub>2</sub>-saturated 0.1 M KOH solution at a sweep rate of 10 mV s<sup>-1</sup> and electrode rotation speed of 1600 rpm.

**Table S3.** Current density at 0.2 V for CNTs@PPy-P800 and Pt/C with different catalyst loading (0.2mg cm<sup>-2</sup>, 0.3mg cm<sup>-2</sup>, 0.4mg cm<sup>-2</sup>)

| Sample        | 0.2mg cm <sup>-2</sup>   | 0.3mg cm <sup>-2</sup>   | 0.4mg cm <sup>-2</sup>    |
|---------------|--------------------------|--------------------------|---------------------------|
| Pt/C          | 4.94 mA cm <sup>-2</sup> | 5.98 mA cm <sup>-2</sup> | 6.54 mA cm <sup>-2</sup>  |
| CNTs@PPy-P800 | 6.82 mA cm <sup>-2</sup> | 9.42 mA cm <sup>-2</sup> | 10.32 mA cm <sup>-2</sup> |

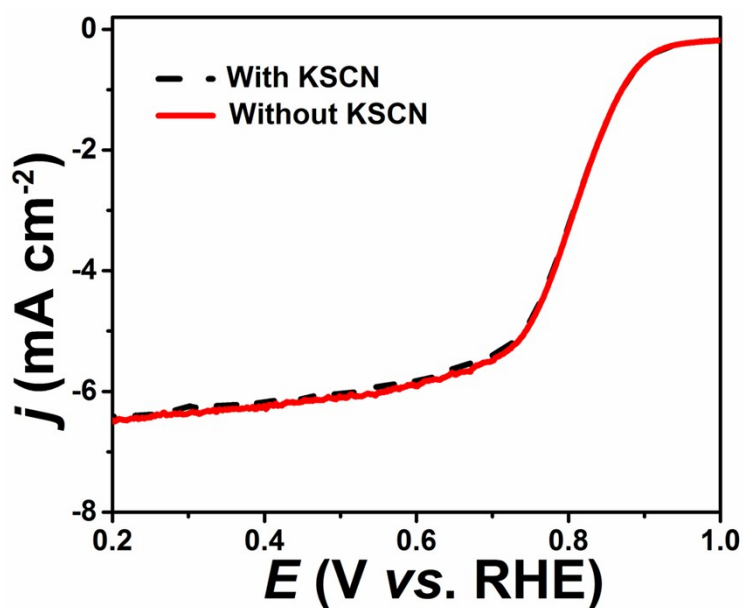

**Fig. S5** LSV curves for CNTs@PPy-P800 without and with 10 mM KSCN.

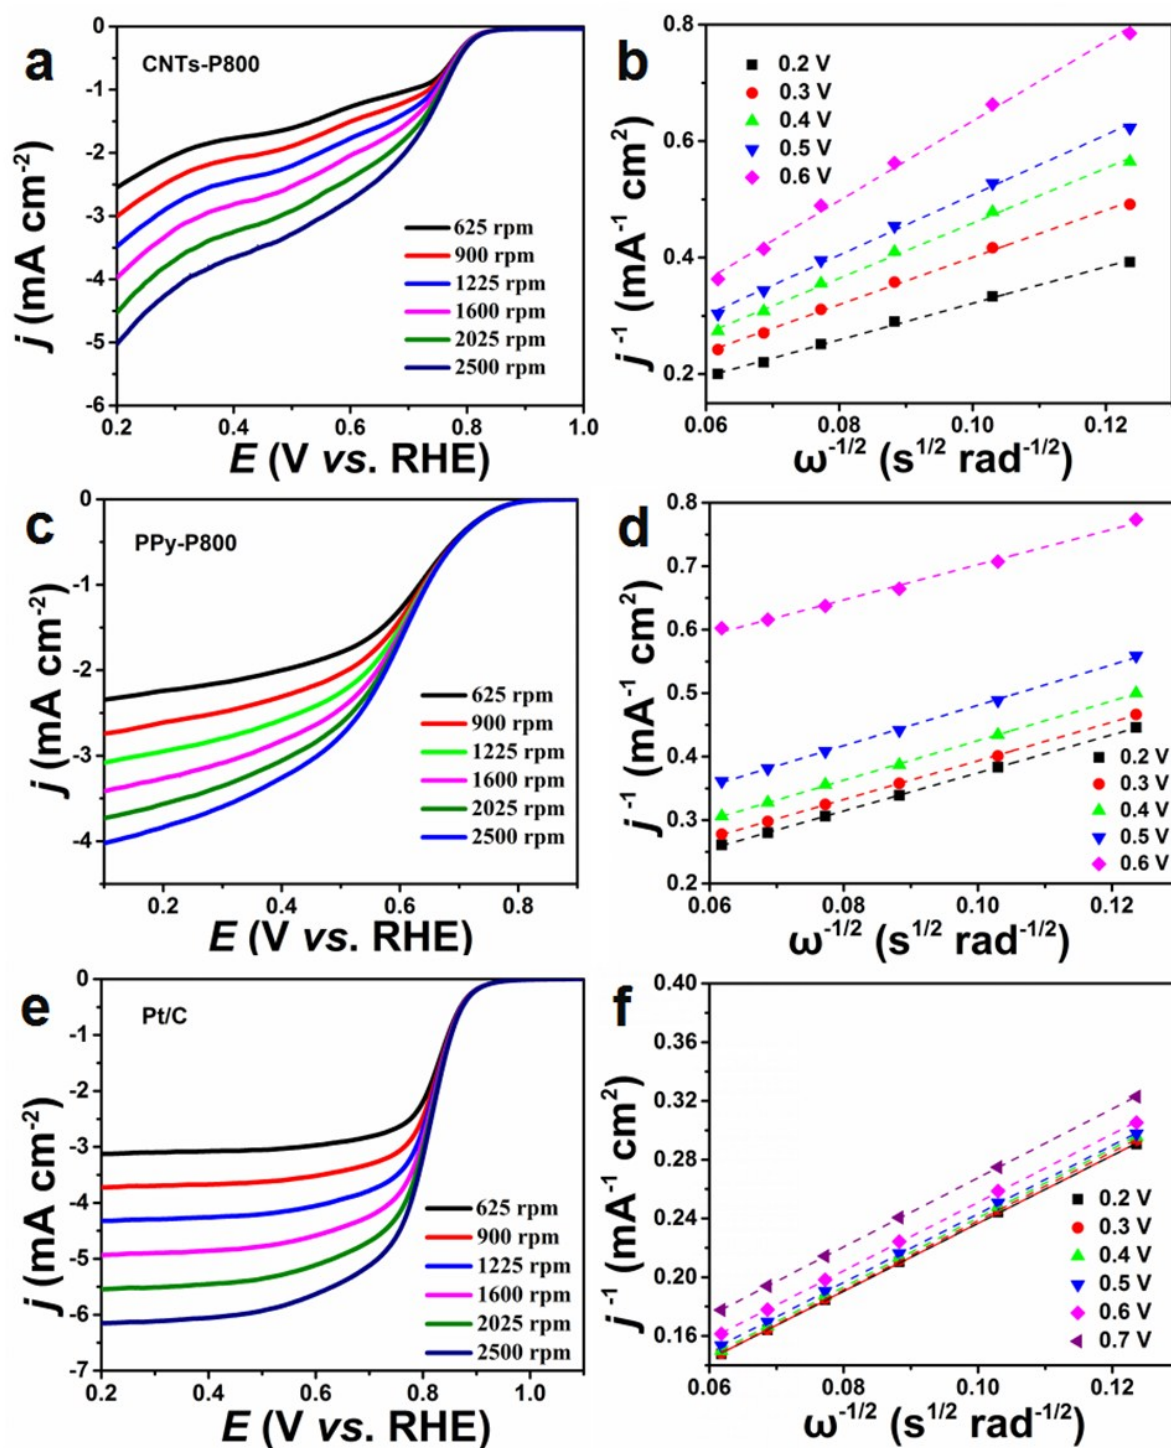

Fig. S6 LSV curves for (a) CNTs-P800, (c) PPy-P800, and (e) Pt/C at the rotation rates of 625 to 2500 rpm, respectively. The corresponding K-L plots derived from the RDE data for (b) CNTs-P800, (d) PPy-P800, and (f) Pt/C, respectively.

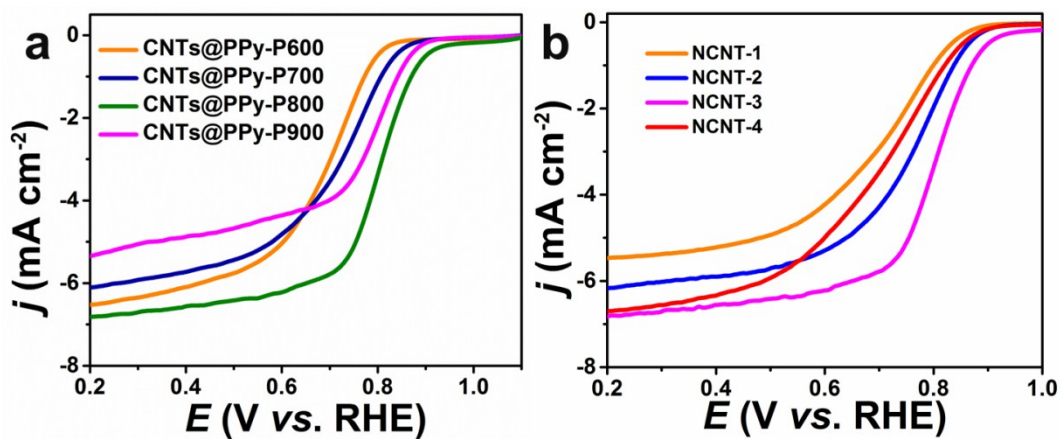

**Fig. S7** (a) LSV curves of CNTs@PPy-*T* (*T* = 600, 700, 800, 900 °C, respectively).  
 (b) LSV curves of NCNT-*x* (*x* = 1, 2, 3 and 4, respectively)

**Table S4.** Comparison of the onset potential, half-wave potential and current density for CNTs@PPy-*T* (*T* = 600, 700, 800, 900 °C, respectively) obtained in this work

| Sample        | $E_{\text{onset}}$ vs. RHE (V) | $E_{1/2}$ vs. RHE (V) | Current density (mA cm <sup>-2</sup> at 0.2V) |
|---------------|--------------------------------|-----------------------|-----------------------------------------------|
| CNTs@PPy-P600 | 0.83                           | 0.69                  | 6.51                                          |
| CNTs@PPy-P700 | 0.87                           | 0.72                  | 6.12                                          |
| CNTs@PPy-P800 | 0.95                           | 0.81                  | 6.82                                          |
| CNTs@PPy-P900 | 0.89                           | 0.77                  | 5.30                                          |



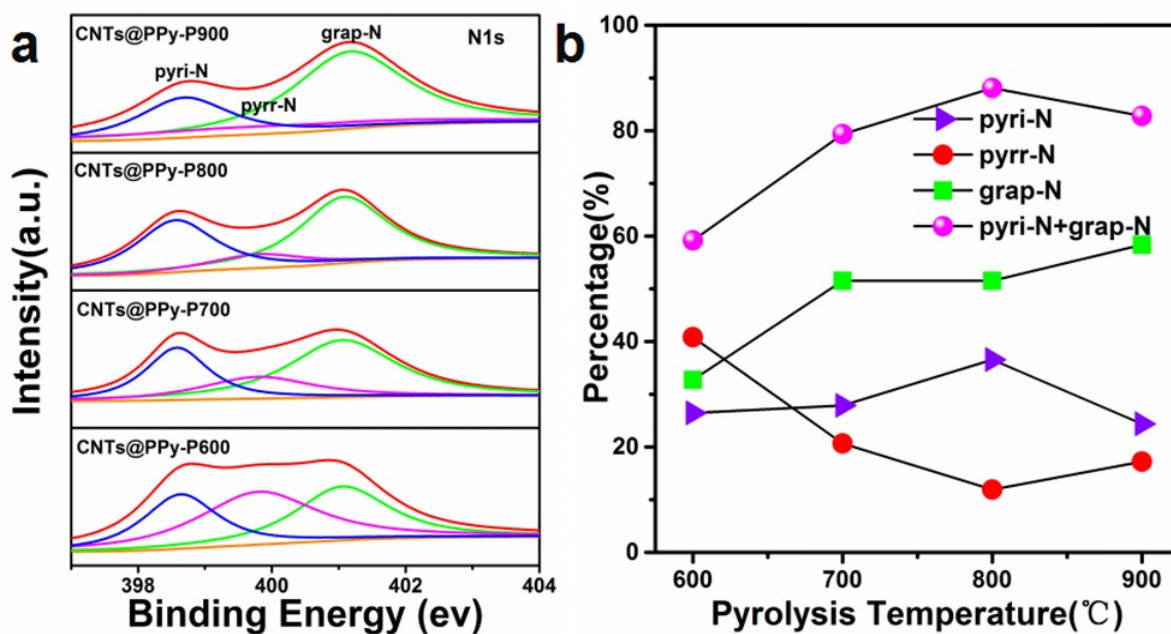

**Fig. S8** (a) N1s XPS spectra and (b) Percentage of various nitrogen species of CNTs@PPy-*T* (*T* = 600, 700, 800 and 900 °C, respectively).

**Table S5.** Percentage of various nitrogen species as a function of pyrolysis temperature.

| Sample        | pyri-N/ $N_{\text{total}}$ (%) | pyrr-N/ $N_{\text{total}}$ (%) | grap-N/ $N_{\text{total}}$ (%) | (pyri-N+grap-N)/ $N_{\text{total}}$ (%) |
|---------------|--------------------------------|--------------------------------|--------------------------------|-----------------------------------------|
| CNTs@PPy-P600 | 26.45                          | 40.8                           | 32.75                          | 59.2                                    |
| CNTs@PPy-P700 | 27.85                          | 20.64                          | 51.51                          | 79.36                                   |
| CNTs@PPy-P800 | 36.58                          | 11.89                          | 51.53                          | 88.11                                   |
| CNTs@PPy-P900 | 24.39                          | 17.24                          | 58.37                          | 82.76                                   |

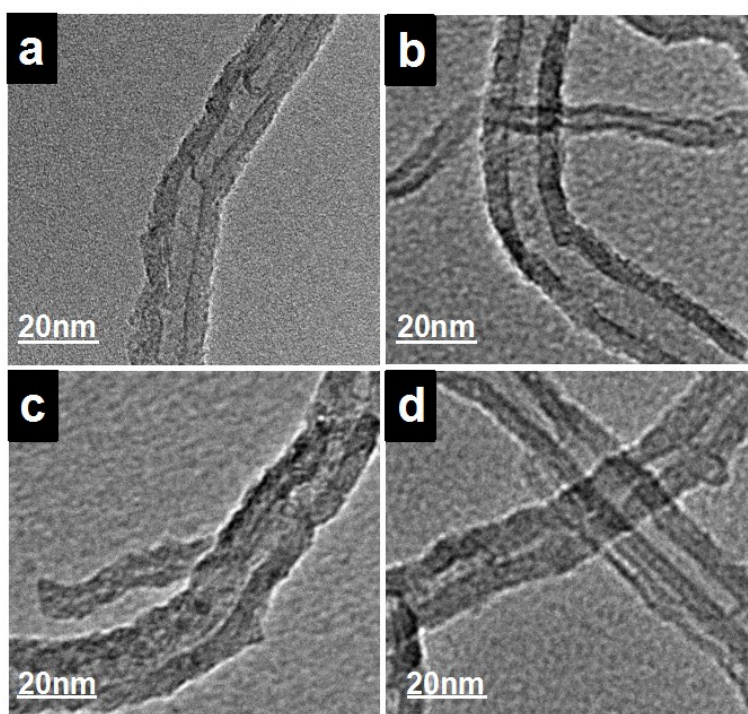

**Fig. S9** HRTEM images of (a) NCNT-1, (b) NCNT-2, (c) NCNT-3, and (d) NCNT-4.

**Table S6.** Comparison of the onset potential, half-wave potential and current density for NCNT-x (x= 1, 2, 3 and 4, respectively)

| Sample | $E_{\text{onset}}$ vs. RHE (V) | $E_{1/2}$ vs. RHE (V) | Current density ( $\text{mA cm}^{-2}$ at 0.2V) |
|--------|--------------------------------|-----------------------|------------------------------------------------|
| NCNT-1 | 0.87                           | 0.71                  | 5.5                                            |
| NCNT-2 | 0.90                           | 0.78                  | 6.2                                            |
| NCNT-3 | 0.95                           | 0.81                  | 6.82                                           |
| NCNT-4 | 0.9                            | 0.73                  | 7.25                                           |

**Table S7.** The elements content of NCNT-x (x= 1, 2, 3 and 4, respectively)

| Sample | C(%)  | O(%) | N(%) |
|--------|-------|------|------|
| NCNT-1 | 93.08 | 4.86 | 2.06 |



|        |       |      |      |
|--------|-------|------|------|
| NCNT-2 | 91.00 | 3.65 | 5.35 |
| NCNT-3 | 88.50 | 4.59 | 6.90 |
| NCNT-4 | 88.14 | 3.97 | 7.89 |

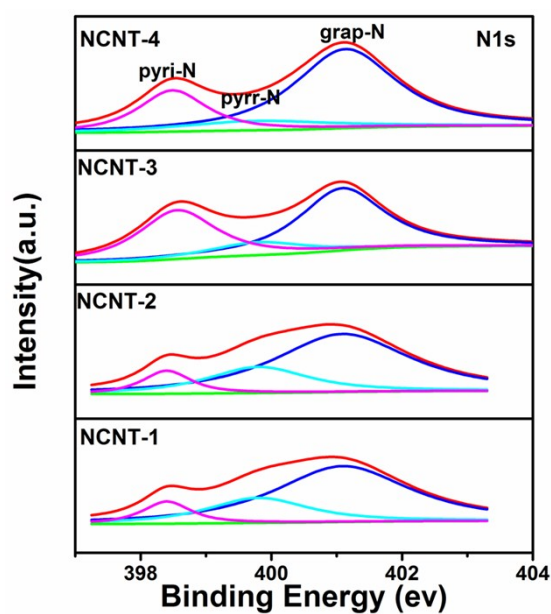

**Fig. S10** (a) N1s XPS spectra of NCNT-x (x= 1, 2, 3 and 4, respectively).

**Table S8.** Percentage of various nitrogen species of NCNT-x (x= 1, 2, 3 and 4, respectively)

| Sample | pyri-N/ $N_{total}$ (%) | pyrr-N/ $N_{total}$ (%) | grap-N/ $N_{total}$ (%) | (pyri-N+grap-N)/ $N_{total}$ (%) |
|--------|-------------------------|-------------------------|-------------------------|----------------------------------|
| NCNT-1 | 9.68                    | 22.85                   | 67.47                   | 77.15                            |
| NCNT-2 | 12.15                   | 21.92                   | 65.93                   | 78.08                            |
| NCNT-3 | 36.58                   | 11.89                   | 51.53                   | 88.11                            |
| NCNT-4 | 22.92                   | 11.9                    | 65.17                   | 88.10                            |

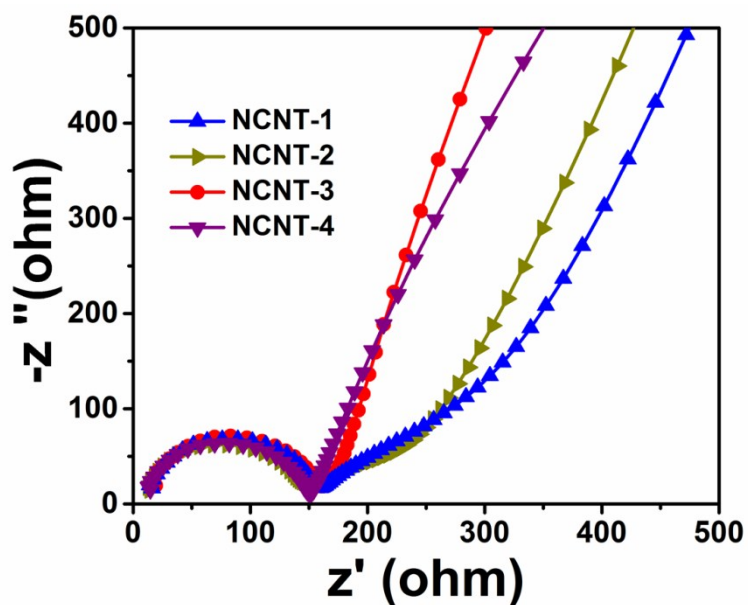

**Fig. S11** EIS spectra of NCNT-x (x= 1, 2, 3 and 4, respectively).

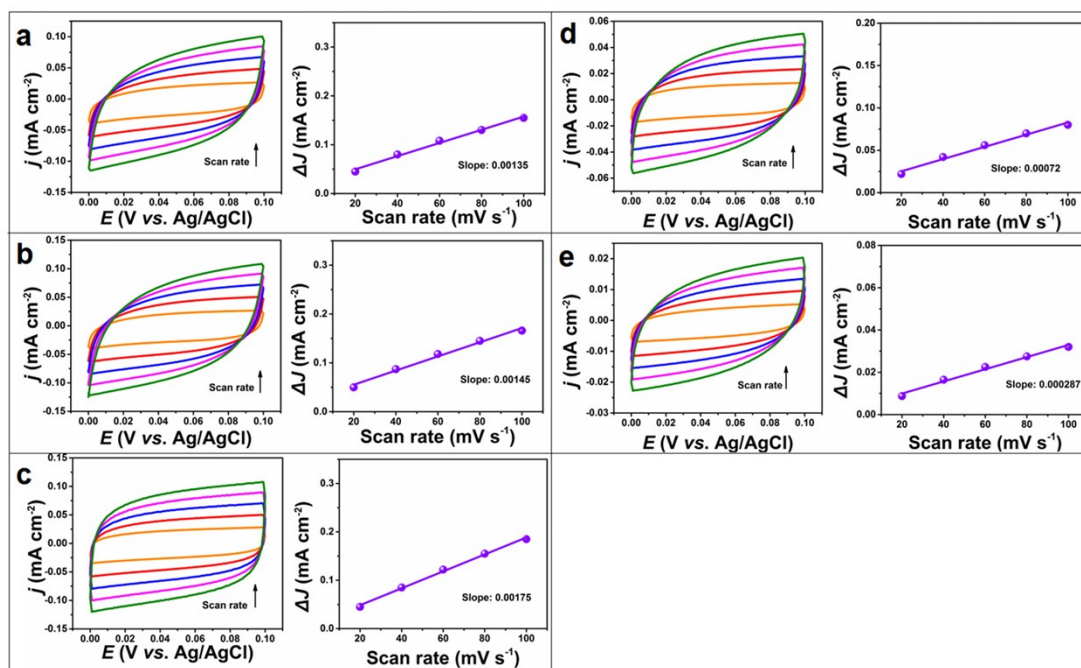

**Fig. S12** CV curves at various scan rates (20, 40, 60, 80 and 100 mV/s) in the potential range 1–1.1 V vs. RHE for NCNT-x (x= 1, 2, 3 and 4, respectively) and CNT-P800 catalyst in 0.1 M KOH.

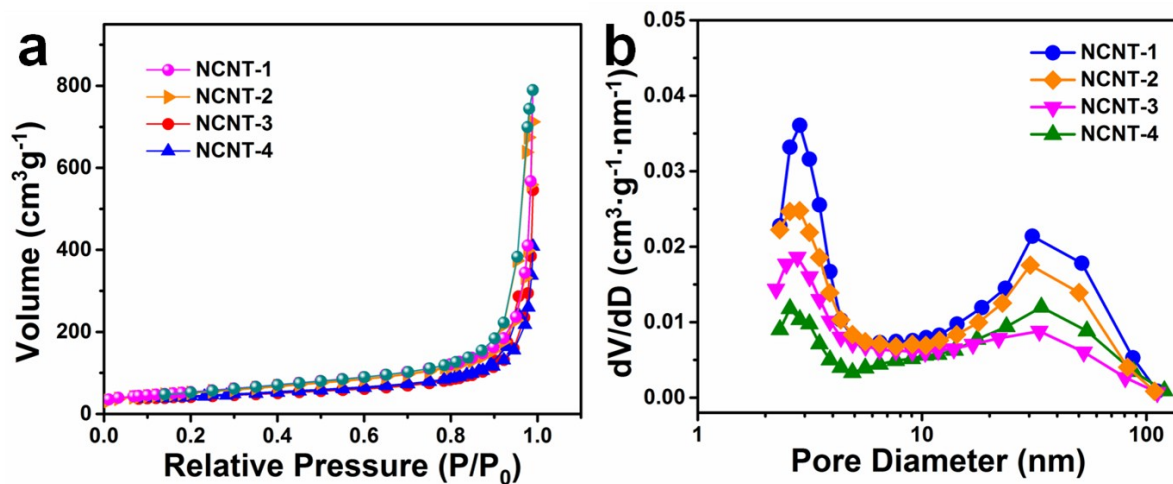

**Fig. S13** (a) N<sub>2</sub> sorption isotherms and (b) the pore size distribution of NCNT-*x* (*x*= 1, 2, 3 and 4, respectively).

**Table S9.** The surface area of NCNT-*x* (*x*= 1, 2, 3 and 4, respectively)

| Sample | BET surface area (m <sup>2</sup> g <sup>-1</sup> ) |
|--------|----------------------------------------------------|
| NCNT-1 | 192.47                                             |
| NCNT-2 | 181.91                                             |
| NCNT-3 | 151.02                                             |
| NCNT-4 | 149.46                                             |

**Table S10.** ORR performance of different catalysts ( the electrolyte is 0.1 M KOH)

| Catalyst           | Loading (mg cm <sup>-2</sup> ) | E <sub>onset</sub> vs. RHE (V) | E <sub>1/2</sub> vs. RHE (V) | Current density (mA cm <sup>-2</sup> at 0.4V) | Ref. |
|--------------------|--------------------------------|--------------------------------|------------------------------|-----------------------------------------------|------|
| N-doped CNT arrays | Unknown                        | 0.96                           | /                            | /                                             | S1   |
| N-doped CNTs       | 0.204                          | 0.853                          | 0.654                        | /                                             | S2   |
| EDA-NCNT           | Unknown                        | 0.94                           | 0.81                         | 4.91                                          | S3   |

|                     |        |       |       |      |           |
|---------------------|--------|-------|-------|------|-----------|
| Winged N-doped CNTs | 0.222  | 0.93  | 0.79  | 4.24 | S4        |
| N-CNT-1030          | 0.0813 | 0.91  | 0.694 | 4.80 | S5        |
| N-doped 3D GFs      | 0.012  | 0.78  | /     | 1.20 | S6        |
| CNT@NCNT            | 0.025  | 0.94  | /     | /    | S7        |
| N-Carbon nanosheets | 0.6    | 0.954 | 0.834 | 5.11 | S8        |
| CNTs@PPy-P800       | 0.2    | 0.95  | 0.81  | 6.72 | This work |

## References

- S1 K. Gong, F. Du, Z. Xia, M. Durstock and L. M. Dai, *Science.*, 2009, **323**, 760.
- S2 Z. Chen, D. Higgins and Z. Chen, *Carbon.*, 2010, **48**, 3057.
- S3 Z. Chen, D. Higgins, H. Tao, R. S. Hsu and Z. Chen, *J. Phys. Chem. C.*, 2009, **113**, 21008.
- S4 Y. Cheng, H. Zhang, C. V. Varanasi and J. Liu, *Sci. Rep.*, 2013, **3**, 3195.
- S5 R. Du, N. Zhang, J. H. Zhu, Y. Wang, C. Y. Xu, Y. Hu, N. N. Mao, H. Xu, W. J. Duan, L. Zhuang, L. T. Qu, Y. L. Hou and J. Zhang, *Small.*, 2015, **11**, 3903.
- S6 Y. Zhao, C. Hu, Y. Hu, H. Cheng, G. Shi and L. Qu, *Angew. Chem.*, 2012, **124**, 11533.
- S7 G. L. Tian, Q. Zhang, B. Zhang, Y. G. Jin, J. Q. Huang, D. S. Su and F. Wei, *Adv. Funct. Mater.*, 2014, **24**, 5956.
- S8 W. Wei, H. Liang, K. Parvez, X. Zhuang, X. Feng and K. Müllen, *Angew. Chem. Int. Ed.*, 2014, **53**, 1596.
